# Supplementary material for: The Q-rich/PST domain of the AHR regulates both ligand-induced nuclear transport and nucleocytoplasmic shuttling
Source: PubMed Central journal article supplement (PMC4989234; doi:10.1038/srep32009), 2016-08-18
Supplement: srep32009-s1.pdf [file srep32009-s1.pdf]

**Supplementary information to:**

**The Q-rich/PST domain of the AHR regulates both ligand-induced nuclear transport  
and nucleocytoplasmic shuttling**

Anna Tkachenko<sup>†</sup>, Frank Henkler<sup>†</sup>, Joep Brinkmann, Juliane Sowada, Doris Genkinger, Christian Kern,  
Tewes Tralau, and Andreas Luch\*

Affiliation: German Federal Institute for Risk Assessment (BfR), Department of Chemical and Product  
Safety, Max-Dohrn-Strasse 8-10, 10589 Berlin, Germany.

\*Corresponding author. Email: [Andreas.Luch@bfr.bund.de](mailto:Andreas.Luch@bfr.bund.de); phone: ++49-30-18412-4538.

<sup>†</sup>These authors contributed equally to this work.

Fig. S1

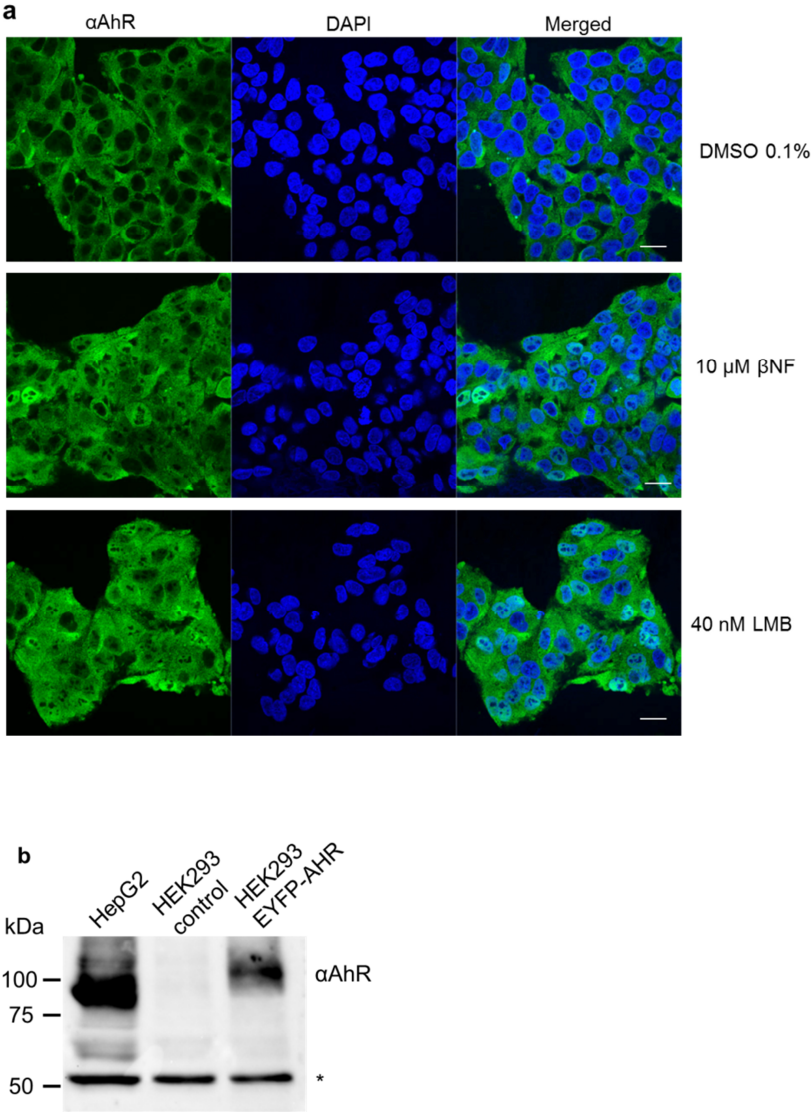

**Figure S1.** (a) Immunofluorescence staining of endogenous wild-type AHR in HepG2 cells after 1 h treatment with 10  $\mu$ M  $\beta$ NF and 40 nM LMB ( $\alpha$ AHR 1:100). Scalebar = 20  $\mu$ m.  $\beta$ NF and LMB induce a similar nuclear translocation of the endogenous AHR. (b) Western-blot analysis of transfected human EYFP-AHR fusion protein in HEK293 cells, compared with endogenous AHR in HepG2 cells. \*Cross-reaction bands indicate equal loading.

Fig. S2

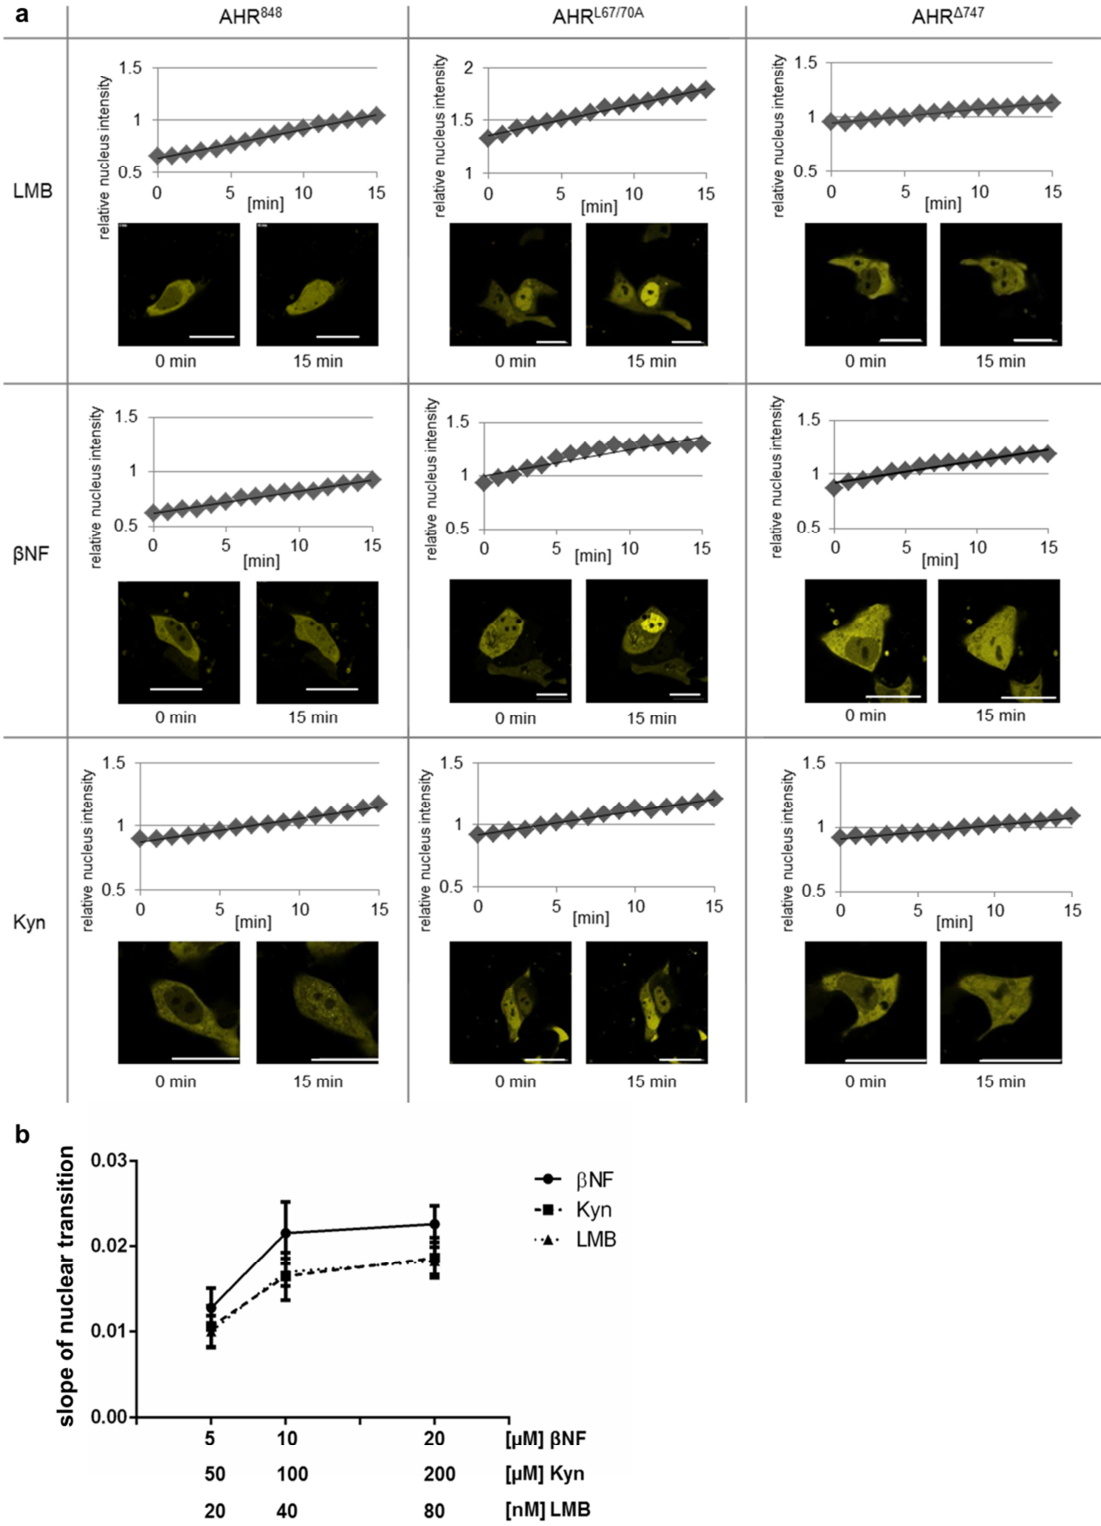

**Figure S2.** (a) Localisation and shuttling of full-length AHR (AHR<sup>848</sup>), AHR<sup>L67/70A</sup> and AHR<sup>Δ747</sup>. Kinetics of protein translocation into the nucleus are shown during 15 min after treatment with 40 nM LMB, 10 μM βNF, or 100 μM Kyn. (b) Dose-dependent increases of the relative nucleus fluorescence intensity induced by βNF, LMB and Kyn. Cells treated with 10 μM βNF, 40 nM LMB and 100 μM Kyn show a similar nuclear fluorescence intensity increase, which significantly differs from solvent (DMSO) control cells (two-way ANOVA,  $p < 0.0001 = ****$ ). Values depicted represent the mean  $\pm$  S.E.M of 6 cells.

**Fig. S3**

Score human LocNES 510 – 748 (Gln 640 is labelled red):

KHEQIDQPQDVNSFAGGHPGLFQDSKNSDLYSIMKNLIGIDFEDIRHMQNEKFFRNDGSGEVDFRDIDLDEILTYV  
QDSLKSPFIPSDYQQQSLALNSSCMVQEHLHLEQQQHHQKQVVVEPQQQLCQKMKHMQVNGMFENWN  
SNQFVPFNCPPQDPQQYNVFTDLHGISQEFYKSEMDSMPYTQNFISCNQPVLPQHSKCTELDYPMGSEFSPYP  
TTSSLEDFVTCLQLPENQ

| Protein Name      | Position | Sequence         | Score |
|-------------------|----------|------------------|-------|
| >LocNES69844683_0 | 25-39    | SKNSDLYSIMKNLGI  | 0.122 |
| >LocNES69844683_0 | 30-44    | LYSIMKNLIGIDFEDI | 0.152 |
| >LocNES69844683_0 | 49-63    | NEKFFRNDGSGEVD   | 0.014 |
| >LocNES69844683_0 | 54-68    | RNDGSGEVDFRDIDL  | 0.026 |
| >LocNES69844683_0 | 62-76    | DFRDIDLDEILTYV   | 0.030 |
| >LocNES69844683_0 | 124-138  | EPQQQLCQKMKHMQV  | 0.025 |
| >LocNES69844683_0 | 219-233  | PYPPTSSLEDFVTCL  | 0.338 |
| >LocNES69844683_0 | 221-235  | PTSSLEDFVTCLQL   | 0.350 |

**Figure S3.** Analysis of the C-terminal domain of the human AHR protein, using the LocNES computational tool<sup>29</sup>.

**Fig. S4**

**a**

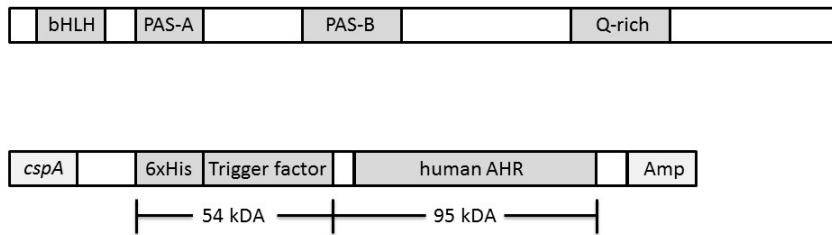

**b**

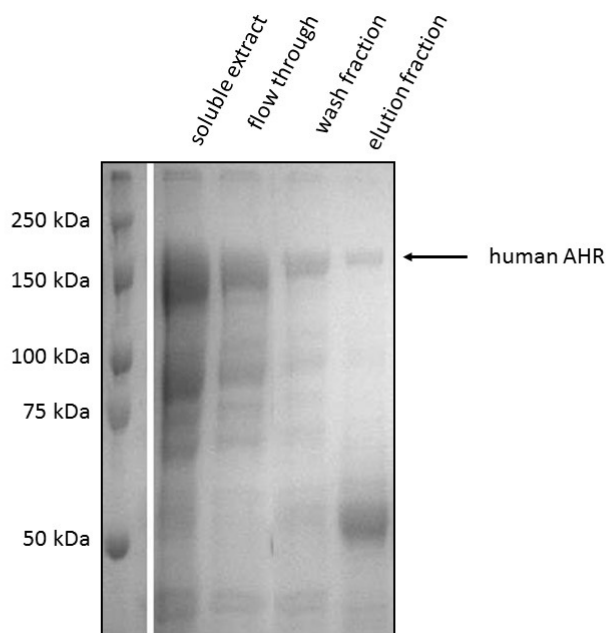

**Figure S4.** AHR expression construct for protein purification. **(a)** Domain structure of the human AHR. The bHLH, PAS and Q-rich domains are marked. A sketch of the generated AHR expression construct is given below. **(b)** Exemplary SDS-PAGE of AHR purification. The eluted fraction contains AHR protein and its degradation products as confirmed by MALDI-ToF (see section Methods).
